# Supplementary material
Source: PubMed Central journal article supplement (PMC11028291)
Supplement: 262_2018_2275_MOESM1_ESM.pdf [file 262_2018_2275_MOESM1_ESM.pdf]

**Supplementary table 1. Clinicopathologic characteristics and PD-L1 expression status of enrolled patients (N=89)**

| Clinicopathological characteristics       | Total cases<br>n (%) | Tumor PD-L1 (pre-neoCRT) |              |                | Tumor PD-L1 (post-neoCRT) |              |              |
|-------------------------------------------|----------------------|--------------------------|--------------|----------------|---------------------------|--------------|--------------|
|                                           |                      | High<br>n (%)            | Low<br>n (%) | p value        | High<br>n (%)             | Low<br>n (%) | p value      |
| Age                                       | 89 (100%)            | 47 (53%)                 | 42 (47%)     | 0.6            | 57 (64%)                  | 32 (36%)     | 0.3          |
| <65                                       | 59 (66%)             | 30 (64%)                 | 32 (63%)     |                | 40 (70%)                  | 19 (59%)     |              |
| ≥65                                       | 30 (34%)             | 17 (36%)                 | 13 (37%)     | 17 (30%)       | 13 (41%)                  |              |              |
| Sex                                       |                      |                          |              | 0.2            |                           |              | 0.97         |
| Female                                    | 28 (31%)             | 12 (26%)                 | 16 (38%)     |                | 18 (32%)                  | 10 (31%)     |              |
| Male                                      | 61 (69%)             | 35 (74%)                 | 26 (62%)     |                | 39 (68%)                  | 22 (69%)     |              |
| cN stage                                  |                      |                          |              | 0.45           |                           |              | 0.42         |
| Negative                                  | 44 (49%)             | 25 (53%)                 | 19 (45%)     |                | 30 (53%)                  | 14 (44%)     |              |
| Positive                                  | 45 (51%)             | 22 (47%)                 | 23 (55%)     |                | 27 (47%)                  | 18 (56%)     |              |
| Clinical TNM stage (7 <sup>th</sup> AJCC) |                      |                          |              | <b>0.04*</b>   |                           |              | <b>0.04*</b> |
| I                                         | 4 (4%)               | 3 (6%)                   | 1 (2%)       |                | 2 (4%)                    | 2 (6%)       |              |
| II                                        | 40 (45%)             | 22 (47%)                 | 18 (43%)     |                | 28 (49%)                  | 12 (38%)     |              |
| III                                       | 45 (51%)             | 22 (47%)                 | 23 (55%)     |                | 27 (47%)                  | 18 (56%)     |              |
| pN stage                                  |                      |                          |              | 0.2            |                           |              | 0.57         |
| Negative                                  | 59 (66%)             | 34 (72%)                 | 25 (60%)     |                | 39 (68%)                  | 20 (63%)     |              |
| Positive                                  | 30 (34%)             | 13 (28%)                 | 17 (40%)     |                | 18 (32%)                  | 12 (38%)     |              |
| TRG                                       |                      |                          |              | <b>0.02*</b>   |                           |              | 0.4          |
| 3                                         | 57 (64%)             | 32 (68%)                 | 25 (60%)     |                | 37 (65%)                  | 20 (63%)     |              |
| 2                                         | 23 (26%)             | 12 (26%)                 | 11 (26%)     |                | 16 (28%)                  | 7 (22%)      |              |
| 1                                         | 9 (10%)              | 3 (6%)                   | 6 (14%)      |                | 4 (7%)                    | 5 (16%)      |              |
| Clinical response                         |                      |                          |              | <b>0.01*</b>   |                           |              | <b>0.04*</b> |
| CR                                        | 1 (1%)               | 0 (0%)                   | 1 (2%)       |                | 1 (2%)                    | 0 (0%)       |              |
| PR                                        | 38 (43%)             | 21 (45%)                 | 17 (40%)     |                | 24 (42%)                  | 14 (44%)     |              |
| SD                                        | 45 (51%)             | 22 (47%)                 | 23 (55%)     |                | 29 (51%)                  | 16 (50%)     |              |
| PD                                        | 5 (6%)               | 4 (9%)                   | 1 (2%)       |                | 3 (5%)                    | 2 (6%)       |              |
| Chemotherapy                              |                      |                          |              | <b>0.0005*</b> |                           |              | <b>0.02*</b> |
| capecitabine                              | 44 (49%)             | 29 (62%)                 | 15 (39%)     |                | 29 (51%)                  | 15 (47%)     |              |
| UFT                                       | 32 (36%)             | 11 (23%)                 | 21 (45%)     |                | 20 (35%)                  | 12 (38%)     |              |
| 5-FU                                      | 10 (11%)             | 5 (11%)                  | 5 (10%)      |                | 6 (11%)                   | 4 (13%)      |              |
| Others                                    | 3 (3%)               | 2 (4%)                   | 1 (6%)       |                | 2 (4%)                    | 1 (3%)       |              |
| Local recurrence                          |                      |                          |              | <b>0.046*</b>  |                           |              | 0.13         |
| Negative                                  | 80 (90%)             | 45 (96%)                 | 35 (83%)     |                | 53 (93%)                  | 27 (84%)     |              |
| Positive                                  | 9 (10%)              | 2 (4%)                   | 7 (17%)      |                | 4 (7%)                    | 5 (16%)      |              |
| Distant metastasis                        |                      |                          |              | 0.11*          |                           |              | 0.62         |
| Negative                                  | 72 (81%)             | 41 (87%)                 | 31 (74%)     |                | 47 (82%)                  | 25 (78%)     |              |
| Positive                                  | 17 (19%)             | 6 (13%)                  | 11 (26%)     |                | 10 (18%)                  | 7 (22%)      |              |
| Tumor IFN- $\gamma$ (pre-neoCRT)          |                      |                          |              | <b>0.001*</b>  |                           |              |              |
| High                                      | 35 (39%)             | 26 (55%)                 | 9 (21%)      |                | -                         | -            |              |
| Low                                       | 54 (61%)             | 21 (45%)                 | 33 (79%)     |                | -                         | -            |              |
| Tumor IFN- $\gamma$ (post-neoCRT)         |                      |                          |              |                |                           |              | 0.26         |
| High                                      | -                    | -                        | -            |                | 50 (88%)                  | 28 (88%)     |              |
| Low                                       | -                    | -                        | -            |                | 7 (12%)                   | 4 (13%)      |              |
| NA                                        | -                    | -                        | -            |                | -                         | -            |              |
| Tumor TGF- $\beta$ (pre-neoCRT)           |                      |                          |              | 0.3            |                           |              |              |
| High                                      | 62 (70%)             | 35 (74%)                 | 27 (62%)     |                | -                         | -            |              |
| Low                                       | 27 (30%)             | 12 (26%)                 | 15 (36%)     |                | -                         | -            |              |
| Tumor TGF- $\beta$ (post-neoCRT)          |                      |                          |              |                |                           |              | 0.1          |
| High                                      | -                    | -                        | -            |                | 52 (91%)                  | 26 (81%)     |              |
| Low                                       | -                    | -                        | -            |                | 5 (9%)                    | 6 (19%)      |              |
| NA                                        | -                    | -                        | -            |                | -                         | -            |              |

cN stage: positive (stage 1+2) vs. negative (stage 0); pN stage: positive (stage 1a+1b+2) vs. negative (stage 0+X); CR: Complete response; PR: partial response; SD: stable disease; PD: progressive disease; tumor PD-L1: high (grade 2+3) vs. low (grade 0+1); tumor IFN- $\gamma$ : high (grade 2+3) vs. low (grade 0+1); tumor TGF- $\beta$ : high (grade 2+3) vs. low (grade 0+1);.

Chi-squared test was used. Fisher's exact test was used when >25% of the cells had expected counts <5.  
The contrast test did not include the "NA" group.

---
